# Supplementary material
Source: PubMed Central journal article supplement (PMC4309719)
Supplement: AEM.03283-14_zam999116037so1.pdf [file AEM.03283-14_zam999116037so1.pdf]

1 **Supplemental information.**

2

3 **Gut symbionts from distinct hosts exhibit genotoxic**  
4 **activity via divergent colibactin biosynthetic pathways**

5

6 Philipp Engel, Maria I. Vizcaino, and Jason M. Crawford

7

8 **Content**

9 Figures S1-S7

10 Tables S1-S5

11 Supplemental materials and methods

12 Supplemental references

13

14

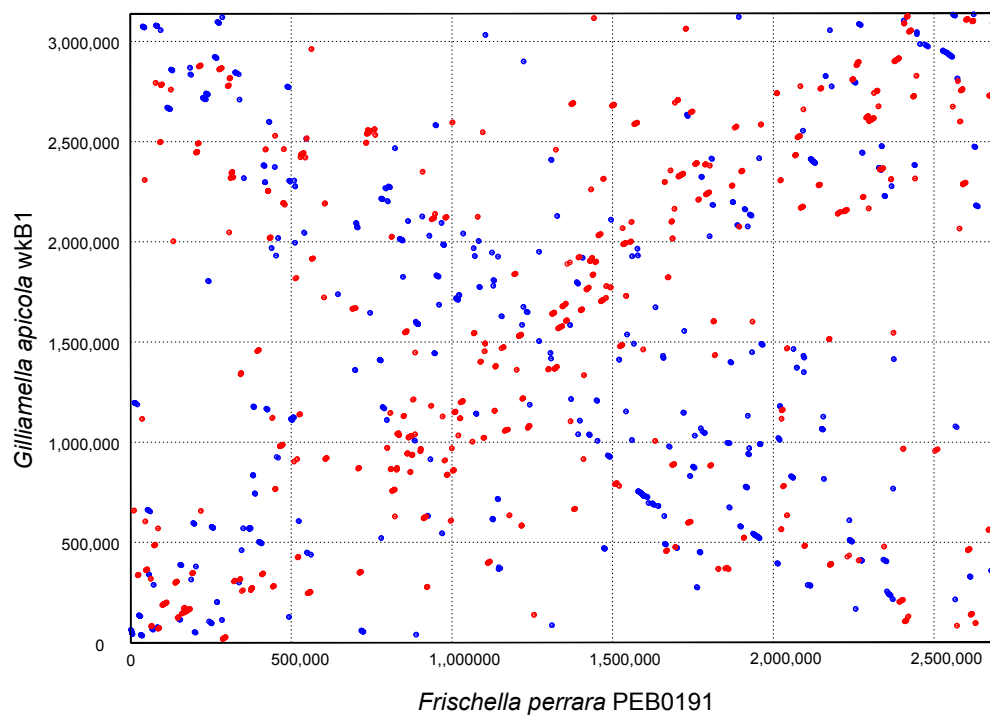

15

16

17 **Figure S1.** Dotplot analysis of the genomes of *G. apicola* wkB1 and *F. perrara*

18 PEB0191. Plots were generated with Promer, a command of the software

19 package MUMmer v3.23 (1). Promer generates local alignments based on amino

20 acid sequences and plots aligned regions onto the x-axis and y-axis representing

21 the genome positions of *F. perrara* PEB0191 and *G. apicola* wkB1, respectively.

22 Default parameters were used. Red and blue dots represent alignments on the

23 same strand and on the opposite strand, respectively.

24



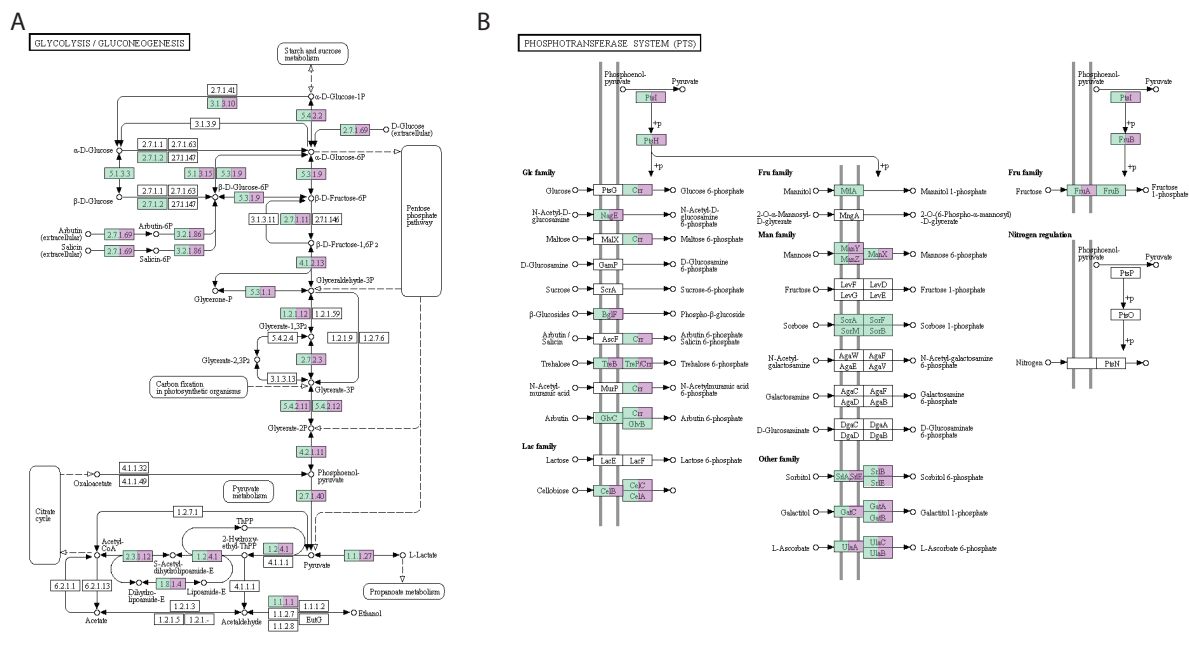

31  
 32 **Figure S3.** Glycolysis (A) and phosphotransferase system (B) genes in the genomes of the two honey bee gut symbionts *F.*  
 33 *perrara* and *G. apicola* wkB1. Gene functions identified in the genomes of *F. perrara* and *G. apicola* wkB1 are highlighted in  
 34 magenta and green, respectively. Other gene functions are either absent or could not be identified.

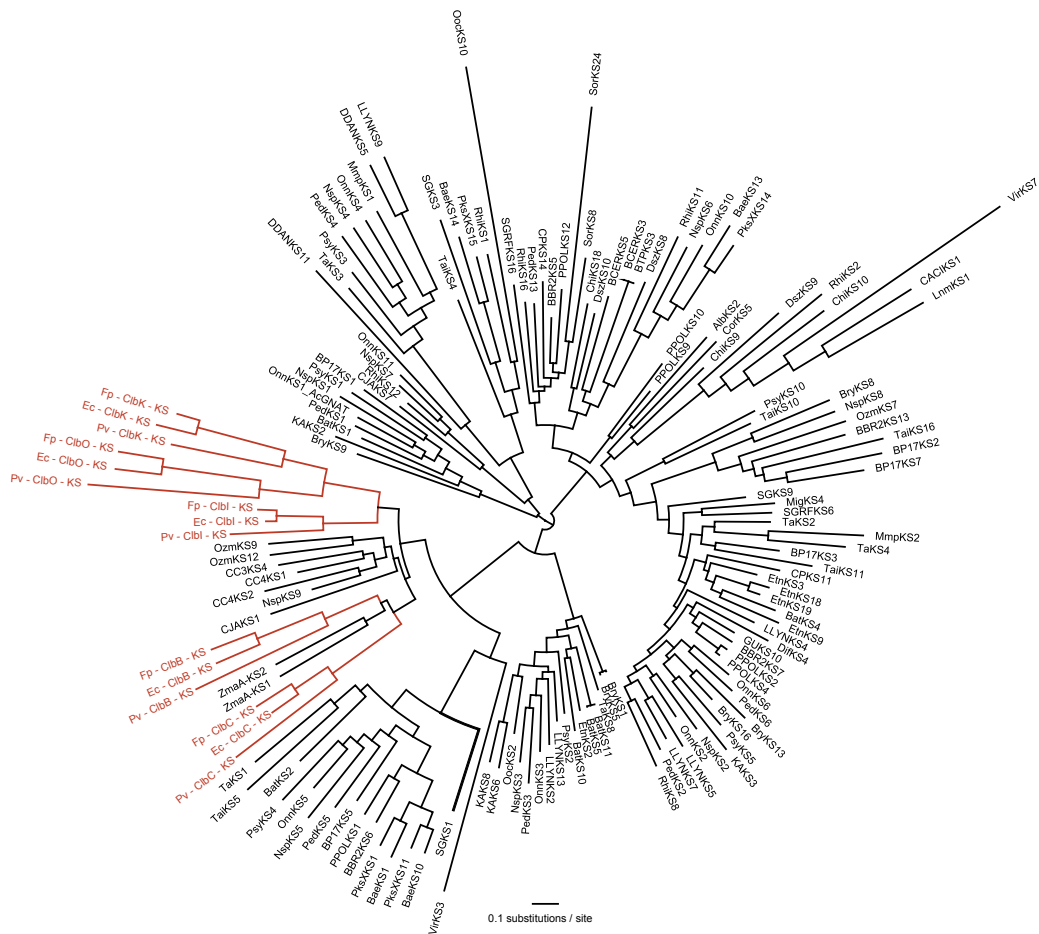

36  
 37 **Figure S4.** Maximum likelihood tree of ketosynthase (KS) domains of 154  
 38 polyketide synthases (PKS) proteins. Amino acid sequences of KS domains were  
 39 obtained from a previous study (2) and aligned together with the KS domains of  
 40 ClbC, ClbK, and ClbO (*trans*-AT PKS), and ClbB and ClbI (*cis*-AT PKS) of *E. coli*  
 41 IHE3034 (Ec), *F. perrara* (Fp), and *Pseudovibrio* FO-BEG1 (Pv). The phylogenetic  
 42 tree was obtained with PhyML (3) using default parameters. KS domains of  
 43 homologous Clb PKS proteins, highlighted in red, cluster together. The next most  
 44 closely related KS domains are found in the following *cis*-AT PKS: ZmA of  
 45 *Bacillus cereus* UW85 involved in the synthesis of zwittermicin (4), OzmK of  
 46 *Streptomyces albus* JA3453 involved in the synthesis of oxazolomycin (5), NspD  
 47 of *Nostoc* sp. 'Peltigera membranacea cyanobiont' involved in the synthesis of

48 nosperin (2), VirA of *Streptomyces virginiae* involved in the synthesis of  
49 virginiamycin A (6), several PKSs of *Clostridium cellulolyticum* H10 (CC), and one  
50 PKS of *Cellvibrio japonicus* Ueda107 (CJA).

51

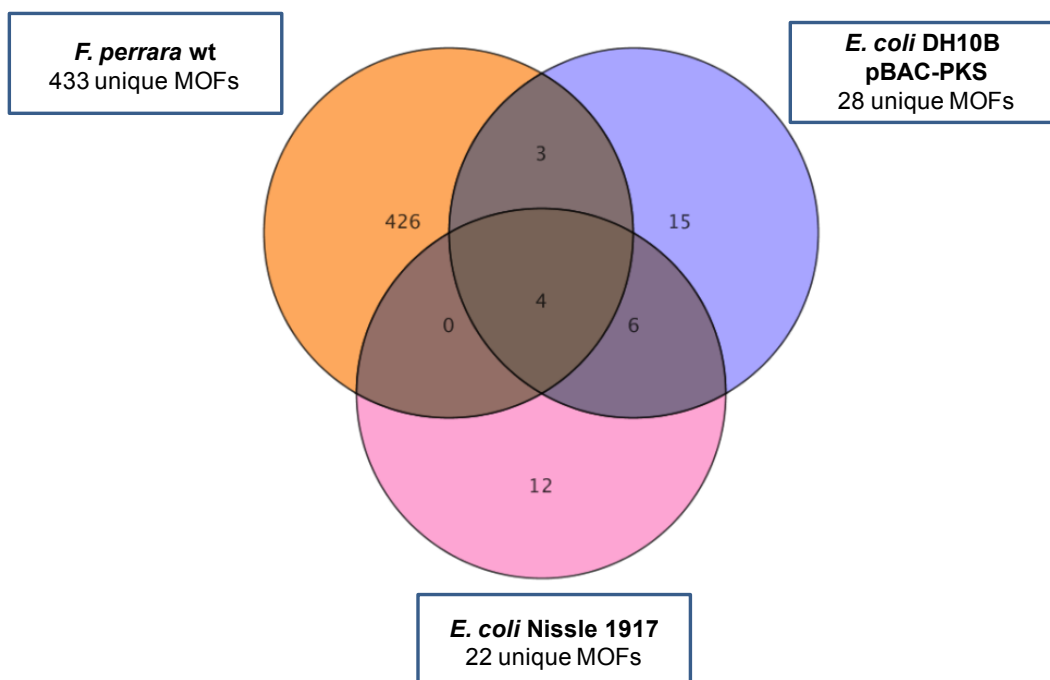

52

53

54 **Figure S5.** Venn Diagram comparison of the unique molecular features (MOFs)  
 55 found in wild-type colibactin-bearing bacteria. The orange circle shows all MOFs  
 56 of *F. perrara* PEB0191 (wt), from which MOFs found in the media controls were  
 57 removed. The purple circle shows all MOFs of *E. coli* DH10B pBAC-PKS, from  
 58 which MOFs found in *E. coli* DH10B pBAC-control were removed. The magenta  
 59 circle shows all MOFs of *E. coli* Nissle 1917, from which MOFs found in *E. coli*  
 60 Nissle 1917  $\Delta clb$  (complete deletion of the genomic island) were removed. There  
 61 are seven metabolites of *F. perrara*, shared among the different strains, four  
 62 shared among all three (see Table S4).

63

### A. ESI-QTOF-HRMS

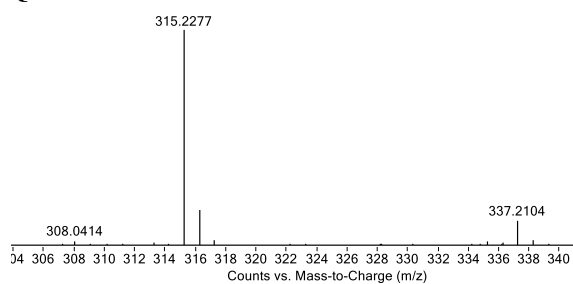

[M+H]<sup>+</sup>  
Obs: 315.2277  
Calc: 315.2284  
Error (ppm): -2.22

### B. MS<sup>2</sup> Fragmentation Pattern

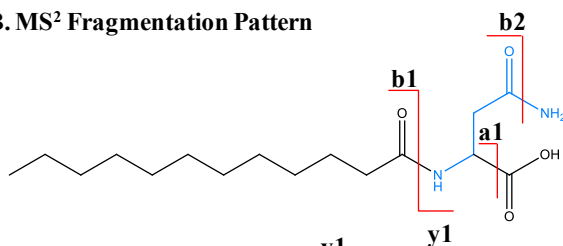

| Species | Obs. Mass | Calc. mass | Error (ppm) |
|---------|-----------|------------|-------------|
| a1      | 87.0556   | 87.0553    | 3.4         |
| b1      | 183.1740  | 183.1743   | 1.6         |
| b2      | 298.2014  | 298.2013   | 0.3         |
| y1      | 133.0609  | 133.0608   | 0.7         |

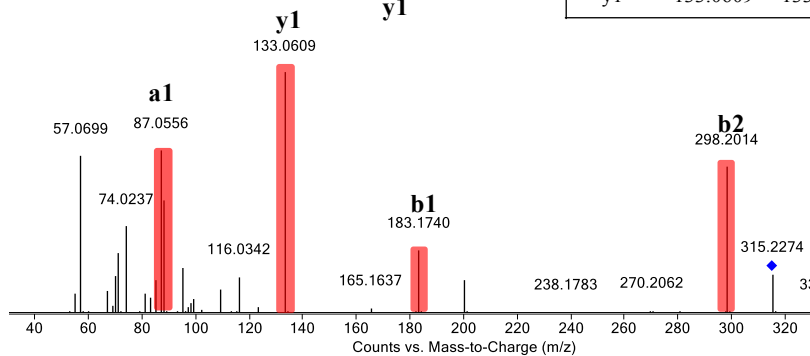

64

65

66 **Figure S6.** (A) ESI-QTOF-HRMS analysis and (B) MS<sup>2</sup> fragmentation pattern of *F.*  
67 *perrara* metabolite **1**. Fragmented species shown in the table are highlighted in  
68 the proposed structure of **1** and the corresponding MS<sup>2</sup> spectra. Observed mass  
69 (Obs mass) and calculated mass (Calc. mass) are shown for both MS and MS<sup>2</sup>  
70 ions, and all ppm errors were calculated to be less than 5.0.

71



72

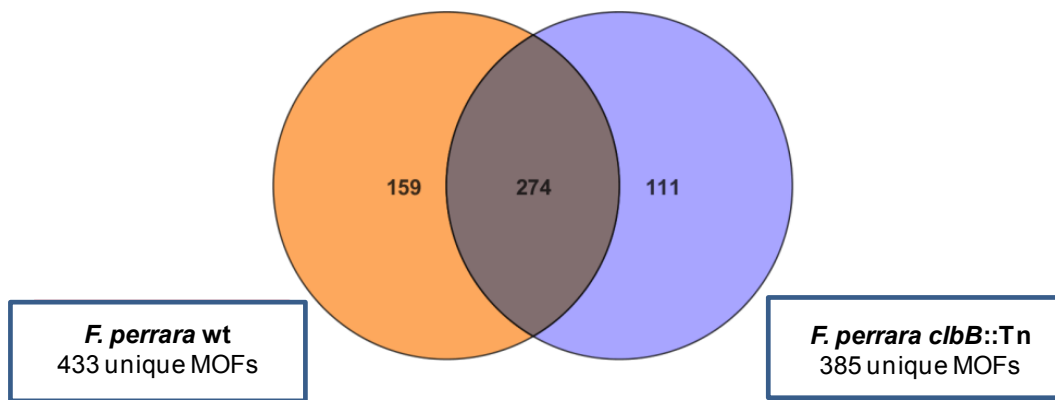

73

74

75 **Figure S7.** Venn diagram comparison of the unique molecular features (MOFs)  
76 found in *F. perrara wt* (PEB0191) and *F. perrara clbB::Tn*. MOFs found in the  
77 media control were removed from both samples.

78

79 **Table S1.** *F. perrara*-specific genes are found in the xls document accompanying  
80 this publication.  
81

82 **Table S2.** Adenylation domain specificity predicted by three bioinformatic tools.

83

| <b>Adenylation domain<sup>a</sup></b> | <b>AntiSmash (Stachelhaus code)</b> | <b>PKS/NRPS Analysis Web-site</b> | <b>NRPSpredictor2<sup>b</sup></b> |
|---------------------------------------|-------------------------------------|-----------------------------------|-----------------------------------|
| ClbB_Fp                               | valine                              | Pps3-M1-Glu                       | valine (70%)                      |
| ClbB_Pv                               | valine                              | no hit                            | valine (90%)                      |
| ClbB_Ec                               | valine                              | Pps3-M2-Val                       | valine (80%)                      |
| ClbH_Fp                               | serine                              | PhsB-M1-Ser                       | serine (100%)                     |
|                                       | beta-hydroxy-tyrosine               | no hit                            | valine (60%)                      |
| ClbG/H_Pv                             | serine                              | PhsB-M1-Ser                       | serine (100%)                     |
|                                       | beta-hydroxy-tyrosine               | no hit                            | valine (60%)                      |
| ClbH_Ec                               | serine                              | PhsB-M1-Ser                       | serine (100%)                     |
|                                       | beta-hydroxy-tyrosine               | no hit                            | valine (60%)                      |
| ClbJ_Fp                               | glycine                             | no hit                            | glycine (100%)                    |
|                                       | cysteine                            | PchE-M1-Cys                       | cysteine (100%)                   |
| ClbJ_Pv                               | glycine                             | PchE-M1-Cys                       | glycine (100%)                    |
|                                       | cysteine                            | NosC-M2-Gly                       | cysteine (100%)                   |
| ClbJ_Ec                               | glycine                             | no hit                            | glycine (100%)                    |
|                                       | cysteine                            | MtaD-M1-Cys                       | cysteine (100%)                   |
| ClbK_Fp                               | cysteine                            | MtaD-M1-Cys                       | cysteine (100%)                   |
| ClbK_Pv                               | cysteine                            | PchE-M1-Cys                       | cysteine (100%)                   |
| ClbK_Ec                               | cysteine                            | MtaD-M1-Cys                       | cysteine (100%)                   |
| ClbN_Fp                               | asparagine                          | Cda2-M3-Asn                       | asparagine (100%)                 |
| ClbN_Pv                               | asparagine                          | Cda2-M3-Asn                       | asparagine (100%)                 |
| ClbN_Ec                               | asparagine                          | Cda2-M3-Asn                       | asparagine (100%)                 |

84 <sup>a</sup>Fp, *F. perrara*, Pv, *Pseudovibrio* sp., Ec, *E. coli* IHE3934

85 <sup>b</sup>Percentages indicate confidence scores

86

87 **Table S3.** Secondary structure analysis with Phyre2 (8) identifies inactivated  
 88 acyltransferase (AT) domains encoded in PKS genes *clbC*, *clbK*, and *clbO*. *ClbG* is a  
 89 conserved trans-AT PKS, which served as a positive control. For each query, only  
 90 the three best hits are shown.

| <i>F. perrara</i><br>PEB0191   | Rank | Hit                                                    | Confidence<br>% | <sup>a</sup> Coverage<br>aa | <sup>b</sup> Gaps<br>aa | <sup>c</sup> Motifs (query /<br>template) |
|--------------------------------|------|--------------------------------------------------------|-----------------|-----------------------------|-------------------------|-------------------------------------------|
| <b>ClbC</b><br>435 aa - 786 aa | 1    | Transferase of PKS: c3tzzA                             | 100%            | 298                         | 149                     | GEGLG / GQ <b>SLG</b>                     |
|                                | 2    | Transferase of PKS: c2qo3A                             | 100%            | 308                         | 140                     | GEGLG / GH <b>SQ</b> G                    |
|                                | 3    | Transferase of PKS: c2hg4A                             | 100%            | 304                         | 140                     | GEGLG / GH <b>SQ</b> G                    |
| <b>ClbK</b><br>421 aa - 724 aa | 1    | Hydrolase of PKS: c4oqjA                               | 100%            | 276                         | 6                       | GQGDG / ADRTE                             |
|                                | 2    | Transferase of PKS: c4mz0B                             | 100%            | 274                         | 125                     | GQGDG / GH <b>SV</b> G                    |
|                                | 3    | Transferase of PKS: c2hg4A                             | 100%            | 275                         | 184                     | GQGDG / GH <b>SQ</b> G                    |
| <b>ClbO</b><br>427 aa - 748 aa | 1    | Transferase of PKS: c3tzzA                             | 100%            | 289                         | 155                     | GNQAG / GQ <b>SL</b> G                    |
|                                | 2    | Transferase of PKS: c2qo3A                             | 100%            | 296                         | 149                     | GNQAG / GH <b>SQ</b> G                    |
|                                | 3    | Transferase of PKS: c2hg4A                             | 100%            | 297                         | 144                     | GNQAG / GH <b>SQ</b> G                    |
| <b>ClbG</b><br>1 aa - 413 aa   | 1    | Transferase of PKS: c2qo3A                             | 100%            | 354                         | 10                      | GH <b>SL</b> G / GH <b>SQ</b> G           |
|                                | 2    | Transferase of malonyl-CoA-ACP transacylase:<br>c3eenA | 100%            | 315                         | 0                       | GH <b>SL</b> G / GH <b>SL</b> G           |
|                                | 3    | Transferase of malonyl-CoA-ACP transacylase:<br>c2qj3B | 100%            | 314                         | 0                       | GH <b>SL</b> G / GH <b>SV</b> G           |
| <i>E. coli</i><br>IHE3034      | Rank | Hit                                                    | Confidence<br>% | Coverage<br>aa              | Gaps<br>aa              | Motifs (query /<br>template)              |
| <b>ClbC</b><br>435 aa - 787 aa | 1    | Transferase of PKS: c4mz0B                             | 98.70%          | 298                         | 78                      | GAGTG / GH <b>SV</b> G                    |
|                                | 2    | Hydrolase of PKS: c4oqjA                               | 98.20%          | 306                         | 12                      | GAGTG / ADRTE                             |
|                                | 3    | Transferase of PKS: c4na3A                             | 97.40%          | 301                         | 5                       | GAGTG / -                                 |
| <b>ClbK</b><br>420 aa - 720 aa | 1    | Hydrolase of PKS: c4oqjA                               | 100%            | 266                         | 14                      | GDGDG / ADRTE                             |
|                                | 2    | Transferase of PKS: c2qo3A                             | 100%            | 265                         | 187                     | GDGDG / GH <b>SQ</b> G                    |
|                                | 3    | Transferase of fatty acid synthetase: c2vz8A           | 100%            | 286                         | 170                     | GDGDG / GH <b>SL</b> G                    |
| <b>ClbO</b><br>427 aa - 746 aa | 1    | Transferase of fatty acid synthetase: c2vz8A           | 100%            | 306                         | 147                     | GYLTG / GH <b>SL</b> G                    |
|                                | 2    | Transferase of PKS: c3tzzA                             | 100%            | 316                         | 58                      | GYLTG / GQ <b>SL</b> G                    |
|                                | 3    | Transferase of PKS: c2qo3A                             | 100%            | 296                         | 150                     | GYLTG / GH <b>SQ</b> G                    |
| <b>ClbG</b><br>1 aa - 422 aa   | 1    | Transferase of PKS: c2qo3A                             | 100%            | 349                         | 12                      | GH <b>SL</b> G / GH <b>SQ</b> G           |
|                                | 2    | Transferase of PKS: c2hg4A                             | 100%            | 351                         | 13                      | GH <b>SL</b> G / GH <b>SQ</b> G           |
|                                | 3    | Transferase of PKS: c3tzzA                             | 100%            | 367                         | 15                      | GH <b>SL</b> G / GQ <b>SL</b> G           |
| <i>Pseudovibrio</i><br>FO-BEG1 | Rank | Hit                                                    | Confidence      | Coverage<br>aa              | Gaps<br>aa              | Motifs(query /<br>template)               |
| <b>ClbC</b><br>434 aa - 752 aa | 1    | Transferase of PKS: c3tzzA                             | 100%            | 271                         | 183                     | GQGDG / GQ <b>SL</b> G                    |
|                                | 2    | Transferase of fatty acid synthetase: c2vz8A           | 100%            | 293                         | 167                     | GQGDG / GH <b>SL</b> G                    |
|                                | 3    | Transferase of PKS: c2qo3A                             | 100%            | 280                         | 187                     | GQGDG / GH <b>SQ</b> G                    |
| <b>ClbK</b><br>426 aa - 744 aa | 1    | Hydrolase of PKS: c4oqjA                               | 100%            | 279                         | 11                      | FAGNK / ADRTE                             |
|                                | 2    | Transferase of PKS: c3tzzA                             | 100%            | 278                         | 172                     | FAGNK / GQ <b>SL</b> G                    |
|                                | 3    | Transferase of PKS: c2qo3A                             | 100%            | 278                         | 166                     | FAGNK / GH <b>SQ</b> G                    |
| <b>ClbO</b><br>444 aa - 799 aa | 1    | Transferase of fatty acid synthetase: c2jfkD           | 97.9%           | 176                         | 14                      | GDGTG / GH <b>SL</b> G                    |
|                                | 2    | Transferase of PKS: c4mz0B                             | 97.3%           | 287                         | 59                      | GDGTG / GH <b>SV</b> G                    |
|                                | 3    | Transferase of PKS: c3tzzA                             | 97.2%           | 188                         | 28                      | GDGTG / GQ <b>SL</b> G                    |
| <b>ClbG</b><br>1 aa - 201 aa   | 1    | Transferase of malonyl-CoA-ACP transacylase:<br>c3tqeA | 100%            | 200                         | 0                       | GH <b>SL</b> G / GH <b>SL</b> G           |
|                                | 2    | Transferase of malonyl-CoA-ACP transacylase:<br>c3eenA | 100%            | 200                         | 0                       | GH <b>SL</b> G / GH <b>SL</b> G           |
|                                | 3    | Transferase of malonyl-CoA-ACP transacylase:<br>c3ptwA | 100%            | 200                         | 0                       | GH <b>SL</b> G / GL <b>SL</b> G           |

91 <sup>a</sup>amino acids (aa) of the query sequence in the alignment

92 <sup>b</sup>number of alignment gaps in the query sequence given in amino acids (aa)

93 <sup>c</sup>aligned sequence motifs are shown with the conserved active site Serine residue highlighted in red

94 **Table S4.** Seven colibactin-pathway dependent metabolites shared among *F.*  
 95 *perrara* and two colibactin-bearing *E. coli* strains.<sup>a</sup>

96

| [M]      | [M+H] <sup>+</sup> | RT    | Fp wt  | Fp <i>clbB</i> ::Tn | pBAC-PKS | EcN wt | Proposed structure |
|----------|--------------------|-------|--------|---------------------|----------|--------|--------------------|
| 207.0568 | 208.0640           | 1.18  | 8.E+05 | (4/5)               | 4.E+05   | (1/5)  |                    |
| 258.1221 | 259.1293           | 15.35 | 8.E+05 | -                   | 3.E+05   | (3/5)  |                    |
| 314.2209 | 315.2281           | 14.44 | 2.E+08 | 1.E+06              | 2.E+06   | 8.E+05 | <b>1</b>           |
| 340.2366 | 341.2440           | 15.34 | 7.E+06 | -                   | 3.E+06   | 1.E+06 | <b>3</b>           |
| 342.2520 | 343.2593           | 16.67 | 2.E+07 | (2/5)               | 1.E+08   | 4.E+07 | <b>2</b>           |
| 368.2678 | 369.2749           | 17.37 | 5.E+05 | -                   | 5.E+05   | 4.E+05 | <b>4</b>           |
| 370.2839 | 371.2903           | 18.95 | 9.E+05 | -                   | 3.E+05   | (3/5)  | <b>5</b>           |

97

98 <sup>a</sup>Masses not detected in all five biological replicates were represented by the  
 99 number of times they were observed in five replicates). The symbol, -, indicates  
 100 that the mass was not observed in any biological replicates. Abbreviations are as  
 101 follows: Fp wt, *F. perrara* PEB0191, Fp *clbB*::Tn, *F. perrara clbB*::Tn, pBAC-PKS, *E.*  
 102 *coli* DH10B pBAC-PKS, EcN wt, *E. coli* Nissle 1917.

103

104 **Table S5.** Colibactin-pathway dependent metabolites from *F. perrara*.

| [M]                     | <i>m/z</i>            | <i>m/z</i> <sup>a</sup> | RT (min) | Fp <i>wt</i> | Fp <i>clbB</i> ::Tn | Proposed structure <sup>b</sup> |
|-------------------------|-----------------------|-------------------------|----------|--------------|---------------------|---------------------------------|
| 227.0962 <sup>c,d</sup> | 228.1040              | n.d.                    | 14.450   | 3E+5         | 0                   |                                 |
| 258.1221                | 259.1293              | 1                       | 15.350   | 8E+5         | 0                   |                                 |
| 286.1897                | 287.1970              | 1                       | 12.128   | 1E+6         | 0                   | <b>6</b>                        |
| 297.1947                | 298.2020              | 1                       | 14.443   | 3E+6         | 0                   |                                 |
| 312.2058                | 313.2129              | 1                       | 13.382   | 1E+6         | 0                   | <b>7</b>                        |
| 312.2067                | 313.2140              | 1                       | 13.655   | 3E+5         | 0                   |                                 |
| 313.0199                | 314.0270              | 1                       | 5.648    | 9E+5         | 0                   |                                 |
| 314.2209                | 315.2281              | 1                       | 14.444   | 2E+8         | 1E+6                | <b>1</b>                        |
| 328.2364                | 329.2443              | 1                       | 15.557   | 4E+6         | 0                   | <b>8</b>                        |
| 340.2366                | 341.2440              | 1                       | 15.345   | 7E+6         | 0                   | <b>3</b>                        |
| 341.1810 <sup>b,c</sup> | 683.3676              | 2                       | 14.442   | 3E+5         | 0                   |                                 |
| 342.2520                | 343.2593              | 1                       | 16.673   | 2E+7         | (2/5)               | <b>2</b>                        |
| 342.9579 <sup>c</sup>   | 343.9651              | n.d                     | 11.335   | 6E+5         | 0                   |                                 |
| 368.2678                | 369.2749              | 1                       | 17.372   | 5E+5         | 0                   | <b>4</b>                        |
| 370.2839                | 371.2903              | 1                       | 18.953   | 9E+5         | 0                   | <b>5</b>                        |
| 414.1452 <sup>c</sup>   | 415.1529              | nd                      | 14.453   | 3E+5         | 0                   |                                 |
| 434.2220                | 218.1183              | 2                       | 14.447   | 2E+6         | 0                   |                                 |
| 666.3902                | 334.2025              | 2                       | 14.448   | 2E+6         | 0                   |                                 |
| 980.6098                | 491.3124;<br>981.6147 | 2;<br>1                 | 14.443   | 2E+6         | 0                   |                                 |
| 996.5832 <sup>c</sup>   | 997.5929              | 1                       | 14.444   | 5E+5         | 0                   |                                 |

105

106 <sup>a</sup>n.d. = could not be determined based on low abundance

107 <sup>b</sup>See Fig. 4

108 <sup>c</sup>Raw abundance determined from diluted metabolomics samples

109 <sup>d</sup>MS<sup>2</sup> fragmentation was not successfully acquired

110

111

112

## 113 **Supplemental materials and methods**

114 **Genome sequencing, assembly, and annotation.** Genomic DNA was isolated  
115 from *F. perrara* PEB0191 grown for 2 days after re-streaking using the phenol-  
116 chloroform method. Libraries for SMRT sequencing (Pacific Biosciences) were  
117 constructed as recommended by the manufacturer. Sequencing of two SMRT  
118 cells was necessary to obtain 64,460 quality-filtered reads of 2.9 kb average  
119 length. Error correction, assembly, and consensus sequence polishing were  
120 carried out with the PacBio HGAP pipeline (9) resulting in two contigs, one large  
121 contig that covered the entire *F. perrara* genome and a second, smaller contig,  
122 which was removed from the assembly due to its low read coverage. The  
123 Illumina paired-end library with approximate insert sizes of 400 bp was  
124 constructed from the genomic DNA following Illumina standard protocols for  
125 genome sequencing using four PCR amplification cycles with the Bio HiFi  
126 polymerase (Kapa Biosystems, Woburn, MA, USA). Illumina sequencing was  
127 carried out on a HiSeq2000 machine in a single 2 × 100 bp lane at the Yale Center  
128 for Genome Analysis. Illumina reads were trimmed on quality with CLC  
129 Genomics Workbench (CLC Bio) as previously published (10). In total, 5,411,774  
130 reads passed the quality filter. These Illumina reads were mapped with BWA  
131 (11) against the PacBio assembly and inspected for misassemblies using the  
132 sequence assembly viewer Tablet (12). A small number of sequencing errors and  
133 one misassembly were detected and corrected. The modified assembly was again  
134 verified by read mapping and by visual inspection. Overhanging ends were  
135 trimmed and the chromosome position 1 set to the origin of replication, which  
136 was detected using the online tool Ori-Finder (13).

137

138 **Transposon mutagenesis.** A transposon mutant library of about ~500 clones  
139 was generated by conjugation of *F. perrara* PEB0191 with *E. coli*  $\beta$ 2163  
140 harboring plasmid pBT20. Cells of *F. perrara* PEB0191 grown for 30 h were  
141 harvested from two GMM (gut microbiota medium) (14) agar plates and  
142 resuspended in 100  $\mu$ L of 1x PBS. An overnight culture of *E. coli*  $\beta$ 2163 harboring  
143 plasmid pBT20 was grown for 8 h in LB supplemented with 30  $\mu$ g/mL  
144 gentamicin, 100  $\mu$ g/mL ampicillin, and 0.3 mM diaminopimelic acid (DAP),  
145 washed once in 1x PBS, and resuspended in 1 mL 1x PBS. 20  $\mu$ L of resuspended  
146 *E. coli* cells were mixed with the resuspended *F. perrara* cells, spread onto a  
147 nitrocellulose filter (Sartorius) on a GMM agar plate supplemented with 0.1 mM  
148 DAP, and incubated for 16 h at 37° C in a 5% CO<sub>2</sub> incubator. Bacteria were  
149 recovered in 1 mL 1x PBS, washed once, and distributed on eight GMM agar  
150 plates supplemented with 12.5  $\mu$ g/mL gentamicin. After three days of incubation  
151 under anaerobic conditions at 37° C, single colonies (transposon mutants) were  
152 picked, resuspended in 150  $\mu$ L GMM supplemented with 12.5  $\mu$ g/mL gentamicin  
153 and grown at 37°C under anaerobic conditions in a 96-well plate. Pools of 96 and  
154 48 transposon mutants were generated, and genomic DNA was isolated using the  
155 DNAeasy kit (Qiagen). The remaining bacterial suspensions of the single  
156 transposon mutants were frozen at -80° C after adding 30  $\mu$ L of glycerol. We  
157 screened all mutant pools by PCR with nine different primer combinations, each  
158 combination consisting of two outward-facing primers (prRND1 and  
159 prRND1rev) annealing to the two ends of the transposon and one of nine  
160 primers (prPE209-217) annealing to different regions of the *clb* GI. PCRs were  
161 analyzed by agarose gel electrophoresis to identify amplicons possibly  
162 originating from a transposon insertion into the *clb* GI. Single transposon  
163 mutants of pools suspected to contain an insertion mutant in the *clb* GI were



164 then individually screened by PCR. The transposon integration in the gene *clbB*  
165 was confirmed by PCR over the integration site (prPE245 and prPE246) and by  
166 Sanger sequencing. All strains, plasmids, and primers used in this study are  
167 summarized in Table 1.

168

169 **Analysis of  $\gamma$ -H2AX phosphorylation levels in HeLa cells.**  $\gamma$ -H2AX  
170 phosphorylation levels in HeLa cells were analyzed to detect the activation of a  
171 DNA damage response. Therefore,  $3 \times 10^5$  cells were seeded in each well of a 6-  
172 well plate and incubated for 6 h allowing cells to adhere. Then, cells were  
173 transiently infected with bacterial cultures for 4 h at the indicated multiplicity of  
174 infection (MOI). Bacteria were removed by washing the cells 3-6 times with  
175 DMEM/5% FCS. Subsequently, HeLa cells were incubated for 12h in DMEM/5%  
176 FCS supplemented with 200  $\mu$ g/mL gentamicin. Then, cells were removed from  
177 the culture dish with 100  $\mu$ L 0.025% trypsin/0.01% EDTA and spun down in 1  
178 mL cell medium in a microcentrifuge at 200 g. After washing in 1x PBS, cells  
179 were fixed in 4% paraformaldehyde for 10 min at room temperature (RT), then  
180 incubated in 20 mM  $\text{NH}_4\text{Cl}$  for 2 min, and washed again in 1x PBS. HeLa cells  
181 were resuspended in 100  $\mu$ L 1x PBS, and 900  $\mu$ L methanol was added during  
182 constant vortexing. After incubation for 30 min on ice, cells were washed in 0.5%  
183 BSA and incubated in 200  $\mu$ L 0.5 % BSA supplemented with 0.5  $\mu$ L anti- $\gamma$ -H2AX  
184 primary antibody (clone 20E3, Cell Signaling) for 1h at RT. Cells were again  
185 washed in 0.5 % BSA and then incubated in 100  $\mu$ L 0.5 % BSA supplemented  
186 with 2  $\mu$ L of the secondary antibody conjugated to FITC (goat anti-rabbit  
187 AB97199, ABCAM) for 30 min in the dark at RT. Cells were washed once in 0.5%  
188 BSA, resuspended in 500  $\mu$ L 1x PBS, and then analyzed by flow cytometry using a  
189 FACSVerse<sup>Tm</sup> flow cytometer from BD Bioscience.

190 **Supplemental references**

- 191 **1. Kurtz S, Phillippy A, Delcher AL, Smoot M, Shumway M, Antonescu C, et al.**  
192 2004. Versatile and open software for comparing large genomes. *Genome Biol*  
193 **5**:R12.
- 194 **2. Kampa A, Gagunashvili AN, Gulder TAM, Morinaka BI, Daolio C,**  
195 **Godejohann M, et al.** 2013. Metagenomic natural product discovery in lichen  
196 provides evidence for a family of biosynthetic pathways in diverse symbioses.  
197 *Proc Natl Acad Sci USA* **110**:E3129–37.
- 198 **3. Guindon S, Dufayard J-F, Lefort V, Anisimova M, Hordijk W, Gascuel O.**  
199 2010. New algorithms and methods to estimate maximum-likelihood  
200 phylogenies: assessing the performance of PhyML 3.0. *Syst Biol* **59**:307–321.
- 201 **4. Kevany BM, Rasko DA, Thomas MG.** 2009. Characterization of the complete  
202 zwittermicin A biosynthesis gene cluster from *Bacillus cereus*. *Appl Environ*  
203 *Microbiol* **75**:1144–1155.
- 204 **5. Zhao C, Coughlin JM, Ju J, Zhu D, Wendt-Pienkowski E, Zhou X, et al.** 2010.  
205 Oxazolomycin biosynthesis in *Streptomyces albus* JA3453 featuring an  
206 ‘acyltransferase-less’ type I polyketide synthase that incorporates two distinct  
207 extender units. *J Biol Chem* **285**:20097–20108.
- 208 **6. Pulsawat N, Kitani S, Nihira T.** 2007. Characterization of biosynthetic gene  
209 cluster for the production of virginiamycin M, a streptogramin type A antibiotic,  
210 in *Streptomyces virginiae*. *Gene* **393**:31–42.
- 211 **7. Engel P, Kwong WK, Moran NA.** 2013. *Frischella perrara* gen. nov., sp.  
212 **nov., a gammaproteobacterium isolated from the gut of the honeybee, *Apis***

- 213 *mellifera*. Int J Syst Evol Microbiol **63**:3646–3651.
- 214 8. **Kelley LA, Sternberg MJE**. 2009. Protein structure prediction on the Web: a  
215 case study using the Phyre server. Nat Protoc **4**:363–371.
- 216 9. **Chin C-S, Alexander DH, Marks P, Klammer AA, Drake J, Heiner C, et al**.  
217 2013. Nonhybrid, finished microbial genome assemblies from long-read SMRT  
218 sequencing data. Nat Methods **10**: 563-569.
- 219 10. **Engel P, Martinson VG, Moran NA**. 2012. Functional diversity within the  
220 simple gut microbiota of the honey bee. Proc Natl Acad Sci USA **109**:11002–  
221 11007.
- 222 11. **Li H, Durbin R**. 2009. Fast and accurate short read alignment with Burrows-  
223 Wheeler Transform. Bioinformatics **25**:1754-60.
- 224 12. **Milne I, Bayer M, Cardle L, Shaw P, Stephen G, Wright F, Marshall D**.  
225 2010. Tablet--next generation sequence assembly visualization. Bioinformatics  
226 **26**:401-402.
- 227 13. **Gao F, Zhang C-T**. 2008. Ori-Finder: A web-based system for finding oriCs in  
228 unannotated bacterial genomes. BMC Bioinformatics **9**:79.
- 229 14. **Goodman AL, Kallstrom G, Faith JJ, Reyes A, Moore A, Dantas G, et al**.  
230 2011. Extensive personal human gut microbiota culture collections characterized  
231 and manipulated in gnotobiotic mice. Proc Natl Acad Sci USA **108**:6252–6257.
